# Supplementary material for: Laser sintering of polymer particle pairs studied by in situ visualization
Source: Royal Society of Chemistry journal article supplement (doi:10.1039/c8sm02081g), 2018-12-18
Supplement: c8sm02081g4.pdf [file c8sm02081g4.pdf]

# Laser sintering of polymer particle pairs studied by in-situ visualization

## Supplementary information

Prakhyat Hejmady,<sup>a,b</sup> Lambèrt C. A. van Breemen,<sup>a</sup> Patrick D. Anderson,<sup>a</sup> and Ruth Cardinaels<sup>a\*</sup>

<sup>a</sup>Polymer Technology, Department of Mechanical Engineering, Eindhoven University of Technology, P.B. 513, 5600 MB Eindhoven, The Netherlands

<sup>b</sup>Brightlands Materials Center, 6167 RD, Geleen, The Netherlands

\*R.M.Cardinaels@tue.nl

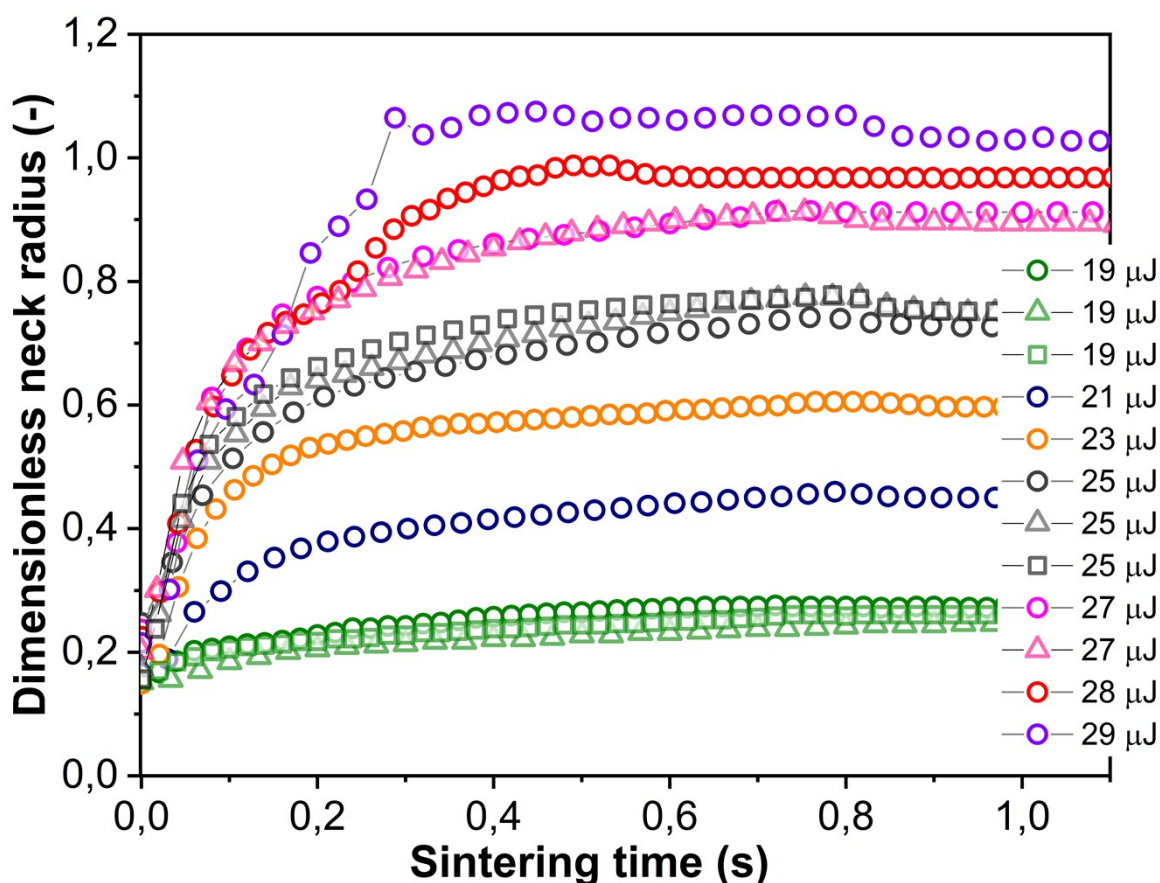

**Fig. S1:** Effect of laser energy on sintering kinetics with heating chamber temperature of  $T_c = 53$  °C, pulse duration of  $t_L = 800$  ms and particle radius of  $a_0 = 60$   $\mu\text{m}$ , side view data. Repeat experiments shown at 19, 25 and 27  $\mu\text{J}$ .
